# Supplementary material for: Production of γ-valerolactone over mesoporous CuO catalysts using formic acid as the hydrogen source
Source: Royal Society of Chemistry journal article supplement (doi:10.1039/d2re00192f), 2022-01-01
Supplement: d2re00192f1.pdf [file d2re00192f1.pdf]

## Supplementary Information

### Production of $\gamma$ -valerolactone over mesoporous CuO catalysts using formic acid as the hydrogen source

Neda Ayashi<sup>a</sup>, Alireza Najafi Chermahini<sup>a,\*</sup>, Nasim amiri ramsheh<sup>a</sup>, Rafael Luque<sup>b,c</sup>

<sup>a</sup>Department of Chemistry, Isfahan University of Technology, Isfahan, 84154-83111, Iran

<sup>b</sup>Departamento de Química Orgánica, Universidad de Córdoba, Campus de Rabanales, Edificio Marie Curie (C-3), Ctra Nnal IV-A, Km 396, E14014, Cordoba, Spain.

<sup>c</sup>Peoples Friendship University of Russia (RUDN University), 6 Miklukho-Maklaya Str., 117198, Moscow, Russia.

\* corresponding author: E-mail: [anajafi@cc.iut.ac.ir](mailto:anajafi@cc.iut.ac.ir); [najafy@gmail.com](mailto:najafy@gmail.com)

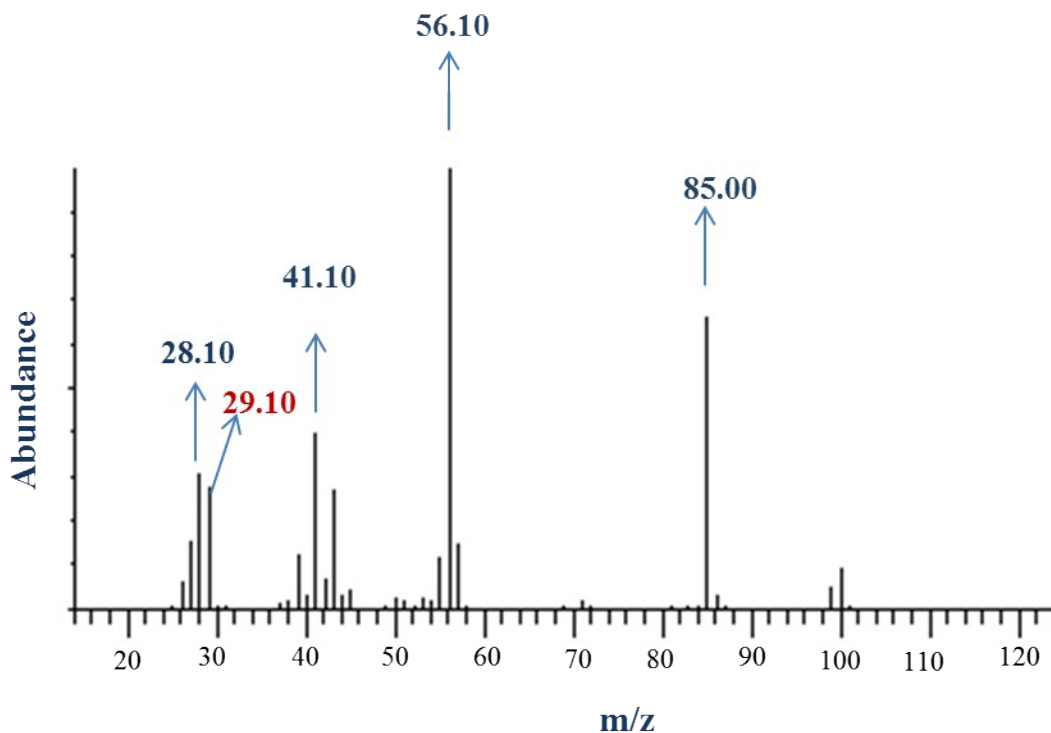

FIGUER S1. Mass spectrum of GVL was synthesized through conversion of BL using formic acid

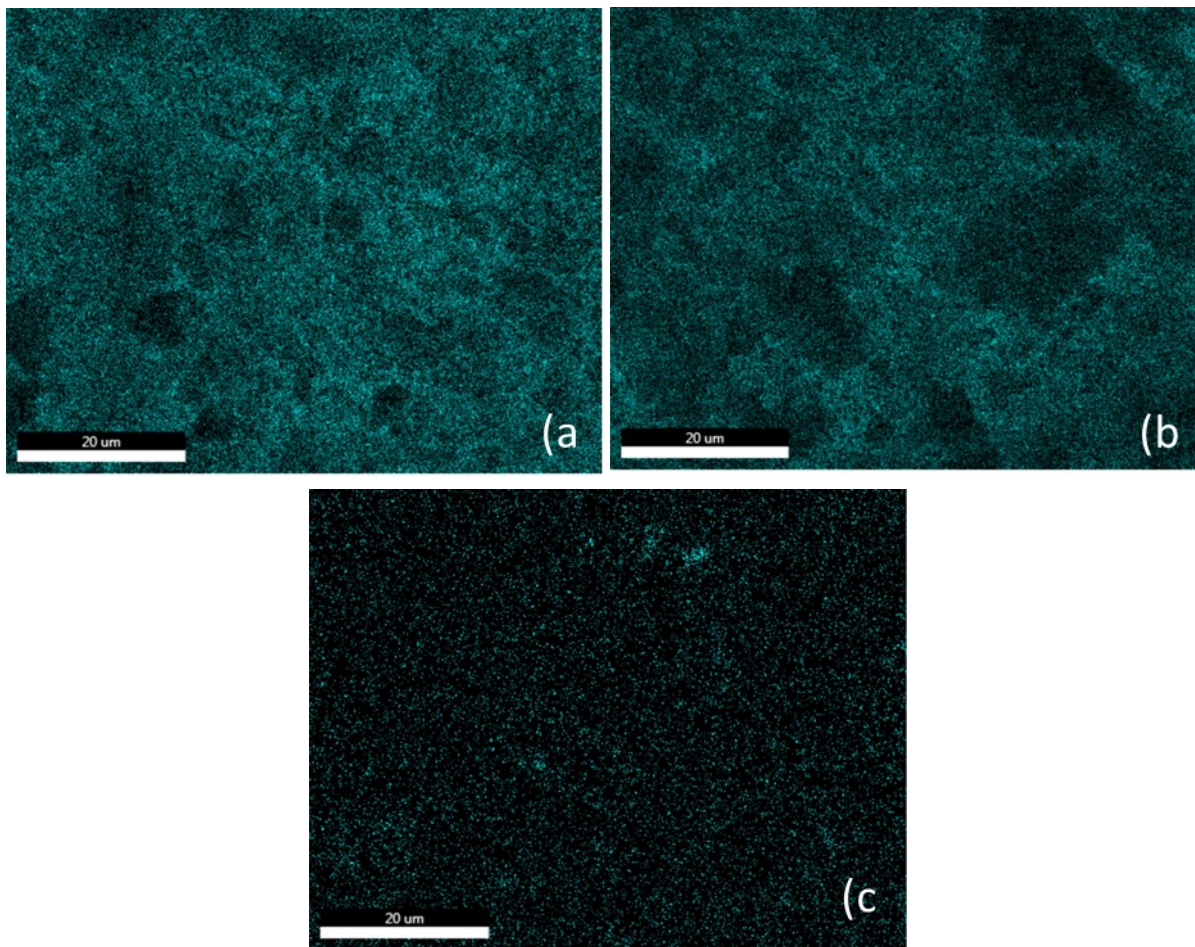

**FIGUER S2.** Elemental mapping (Cu mapping) of a) mCuO, b) mrCuO, d) mCu-KIT-6.

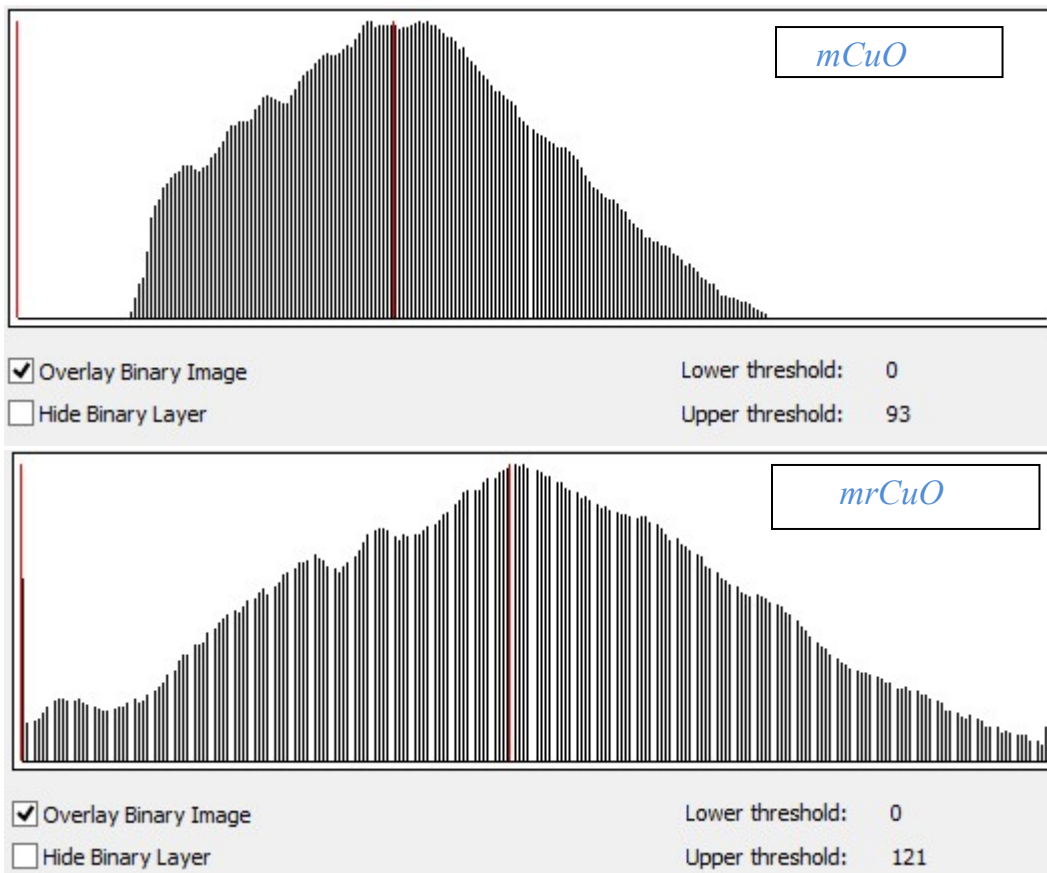

**Figure S3** Histogram of the particle size distribution

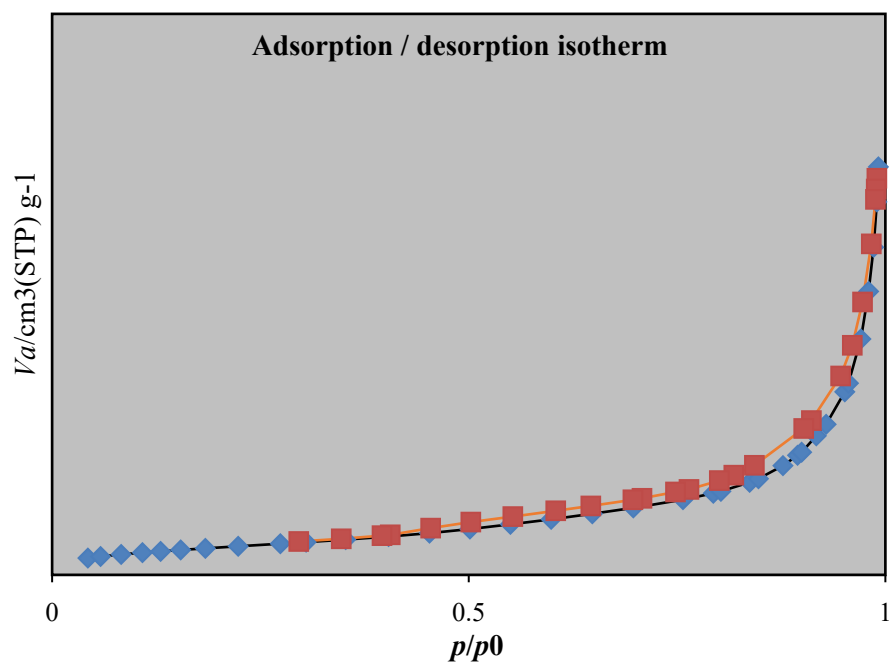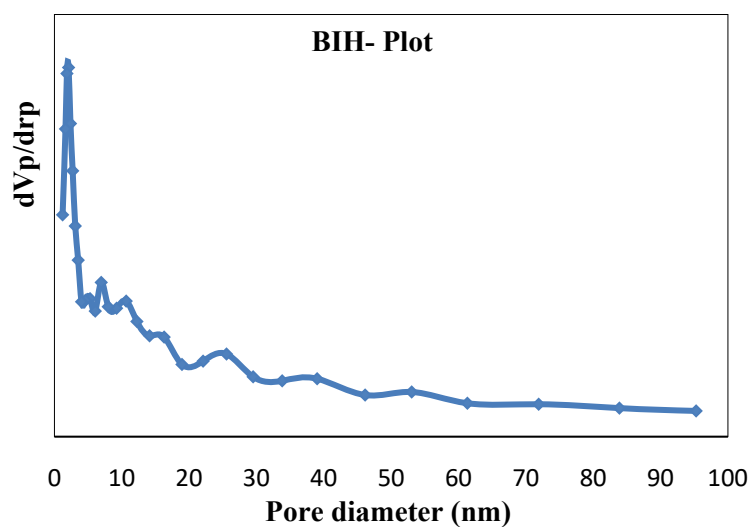

**FIGUER S4.** N<sub>2</sub> adsorption / desorption isotherm and BJH plot of recycled mrcuO.

**Table S1**

Textural and structural properties of recycled mrcuO catalyst.

| Entry | Catalyst          | S <sub>BET</sub> <sup>a</sup> (m <sup>2</sup> g <sup>-1</sup> ) | V <sub>p</sub> <sup>b</sup> (cm <sup>3</sup> /g) | r <sub>p</sub> <sup>c</sup> (nm) |
|-------|-------------------|-----------------------------------------------------------------|--------------------------------------------------|----------------------------------|
| 1     | Recycled catalyst | 22.36                                                           | 0.13                                             | 2.1                              |

<sup>a</sup> Specific surface area.

<sup>b</sup> Pore volume.

<sup>c</sup> Average pore size distribution by BJH.

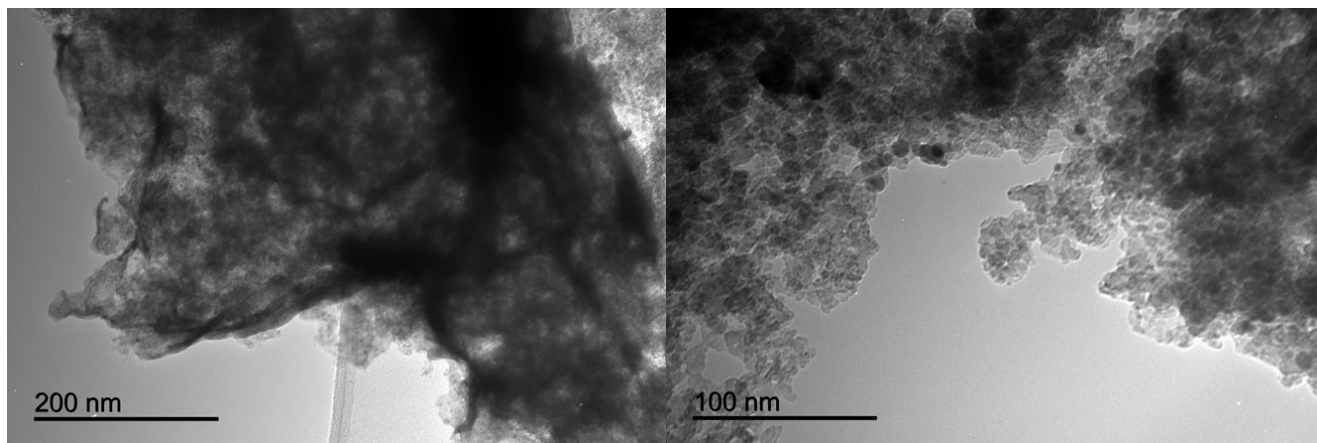

**FIGUER S5.** TEM images of recycled mCuO catalyst
